# Supplementary material for: A robust and highly compressible polyacrylamide co-polymer hydrogel developed through g-C3N4 initiated photopolymerisation and its photocatalytic activity towards dye removal
Source: Royal Society of Chemistry journal article supplement (doi:10.1039/d3nj05474h), 2024-01-01
Supplement: d3nj05474h1.pdf [file d3nj05474h1.pdf]

## Supplementary Information

Robust and highly compressible polyacrylamide co-polymer hydrogel developed through g-C<sub>3</sub>N<sub>4</sub> initiated photopolymerisation and its photocatalytic activity towards dye removal

Asfi Ahmed<sup>a</sup>, Priyankamoni Saikia<sup>a</sup>, Riku Dutta<sup>b</sup>, Swapan K. Dolui<sup>a\*</sup>

<sup>a</sup>Department of Chemical Sciences, Tezpur University, Napaam, Tezpur 784028, Assam, India

<sup>b</sup>Department of Chemical Engineering, Jadavpur University, Jadavpur, Kolkata, West Bengal 700032, India

\*Corresponding Author.

E-mail address: [dolui@tezu.ernet.in](mailto:dolui@tezu.ernet.in)

## Contents

**Figure S1.** Powder X-ray diffraction pattern of the synthesized g-C<sub>3</sub>N<sub>4</sub>

**Figure S2.** Fourier Transform Infrared Spectra of the synthesized g-C<sub>3</sub>N<sub>4</sub>

**Figure S3.** UV-visible absorbance spectra and Band gap energy of the synthesized g-C<sub>3</sub>N<sub>4</sub>

**Figure S4.** PL spectra of synthesized bulk g-C<sub>3</sub>N<sub>4</sub>

**Figure S5.** (a) SEM image, and (b) TEM image of the synthesized g-C<sub>3</sub>N<sub>4</sub>

### **S6. Synthesis of blank hydrogel**

**Table S1.** Detailed composition of the CN hydrogels

**Figure S7.** Photographic image showing compression of the hydrogel (a) uncompressed, and (b) compressed

**Figure S8.** UV-visible absorbance spectra of the dye molecule treated at different solutions of (a) pH 1, (b) neutral (pH 7), and (c) pH 10 under light irradiation at definite time intervals

**Table S2.** Isotherm parameters for adsorption of CV dye by CN hydrogel

**Table S3.** Kinetic parameters for adsorption of CV dyes by CN hydrogel with different adsorbent dosage

**Figure S9.** FTIR spectra of the hydrogel before and after recycling and (b)SEM morphology of the hydrogel after recycling

**Figure S10.** Photographic image showing dye removal by the hydrogel under light irradiation at a definite time interval

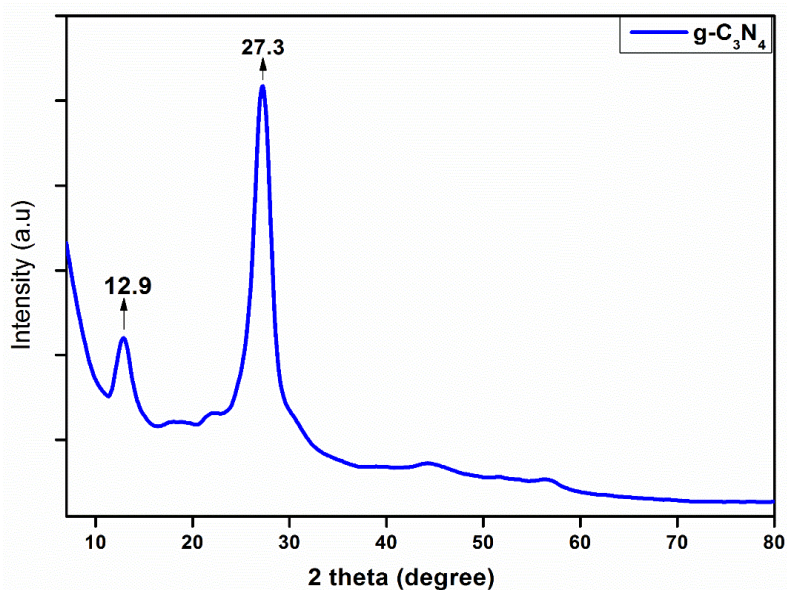

**Figure S2.** Powder X-ray diffraction pattern of the synthesized g-C<sub>3</sub>N<sub>4</sub>

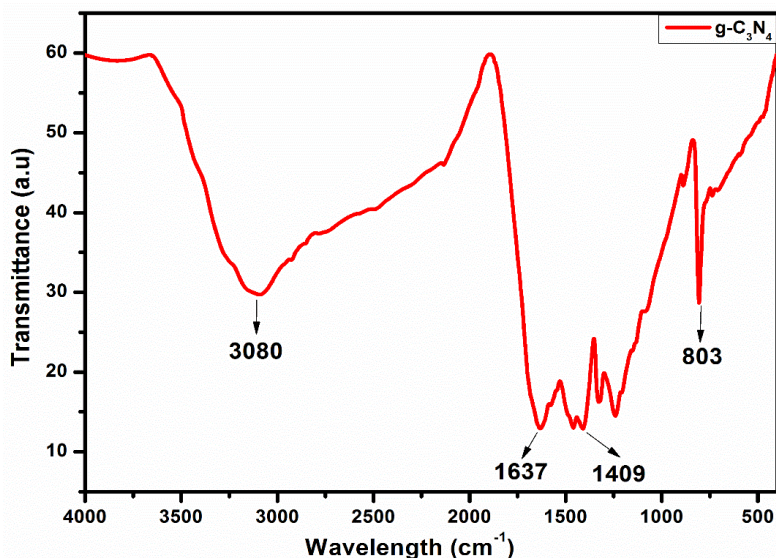

**Figure S2.** Fourier Transform Infrared Spectra of the synthesized g-C<sub>3</sub>N<sub>4</sub>

The XRD pattern for g-C<sub>3</sub>N<sub>4</sub> shows two peaks at around 13° and 27°. The small characteristic peak at around 13° represents (1 0 0) facet which arises due to in-planar tri-s-triazine unit. The strongest characteristic peak at around 27° is indexed as (002) facet, which is usually seen in graphitic materials because of the interaction of the interlayer stacking in the conjugated aromatic system. (Figure S1)

In the FTIR spectra, the peak at 3080 cm<sup>-1</sup> is due to the N-H group vibration present at the surface of carbon nitride or due to the stretching mode of -NH<sub>2</sub> group which are uncondensed amine groups. The strong bands at 1637cm<sup>-1</sup> and 1407 cm<sup>-1</sup> were assigned to the aromatic CN stretching vibration. The intense peak at 803 cm<sup>-1</sup> is attributed to the C-N heterocycles and is the characteristic peak of the triazine molecule. (Figure S2)

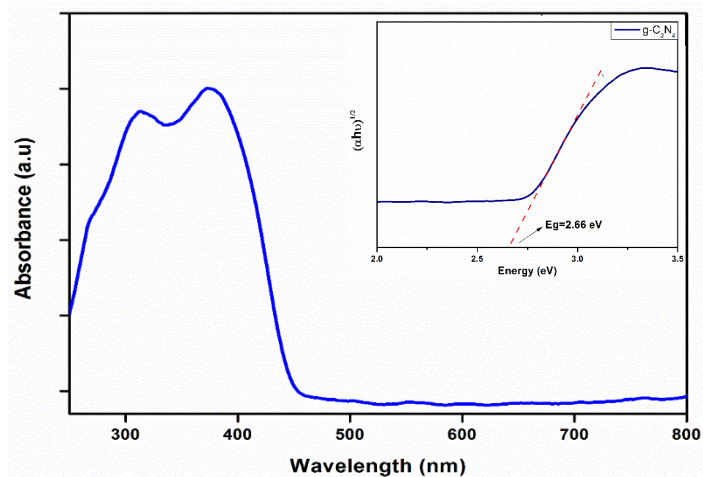

**Figure S3.** UV-Visible absorbance spectra and Band gap energy of the synthesized  $g\text{-C}_3\text{N}_4$

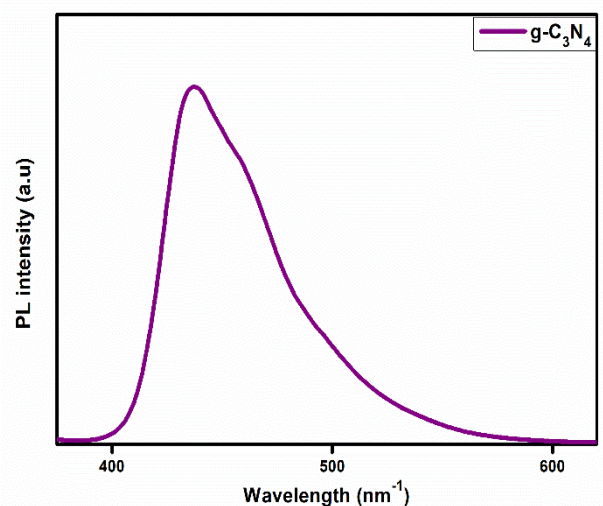

**Figure S4.** PL spectra of synthesized bulk  $g\text{-C}_3\text{N}_4$

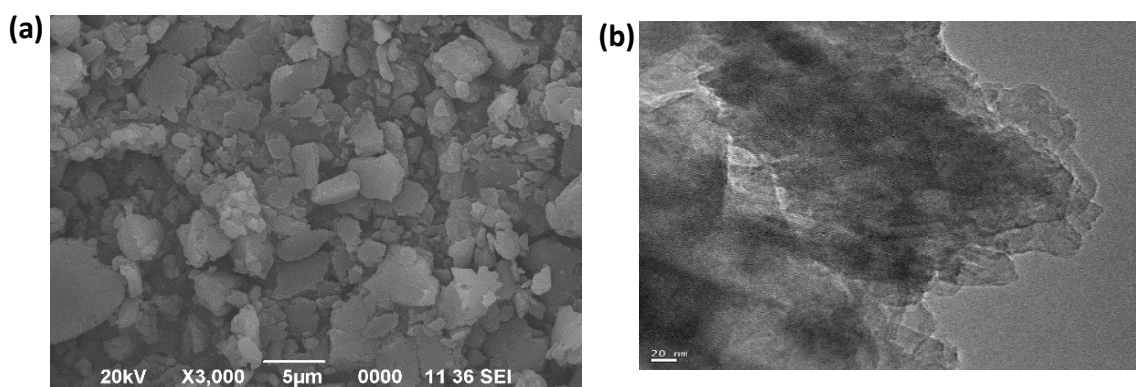

**Figure S5.** (a) SEM image, and (b) TEM image of the synthesized  $g\text{-C}_3\text{N}_4$

The morphological structure of the  $g\text{-C}_3\text{N}_4$  as shown from the SEM image reveals disorderly stacked layers consisting of heterogeneously distributed and agglomerated structures which was further confirmed by its TEM images.

**S6. Synthesis of blank hydrogel (CN0):** 0.8g of AMPS and 0.4g of AAm were taken in a glass vial with 5 mL of deionized water. 1 wt % MBA was then added to the prepared solution as a crosslinker. APS was dissolved in 1mL of water and added dropwise to the prepared solution. The mixture was then flushed with nitrogen for 15 mins and the reaction was kept on stirring for almost 4 hours. The obtained hydrogel was washed several times and dried for further use

**Table S1.** Detailed composition of the CN hydrogels

| Sl.no. | AAm (mg) | AMPS (mg) | g-C <sub>3</sub> N <sub>4</sub> (wt% of total monomer content) | Crosslinker (mg) | N <sub>2</sub> | Light | Hydrogel                      |
|--------|----------|-----------|----------------------------------------------------------------|------------------|----------------|-------|-------------------------------|
| 1      | 400      | 800       | 0.8                                                            | 12               | ✓              | ✓     | CN 0.8                        |
| 2      | 400      | 800       | 1                                                              | 12               | ✓              | ✓     | CN1                           |
| 3      | 400      | 800       | 2                                                              | 12               | ✓              | ✓     | CN2                           |
| 4      | 400      | 800       | 3                                                              | 12               | ✓              | ✓     | CN3                           |
| 5      | 400      | 800       | 4                                                              | 12               | ✓              | ✓     | CN4                           |
| 6      | 400      | 800       | 5                                                              | 12               | ✓              | ✓     | CN5                           |
| 7      | 400      | 800       | 0                                                              | 12               | ✓              | ✓     | No reaction                   |
| 8      | 400      | 200       | 8                                                              | 12               | ✓              | ✓     | CN6                           |
| 9      | 400      | 200       | 8                                                              | 12               | ×              | ✓     | No reaction                   |
| 10     | 400      | 200       | 8                                                              | 12               | ×              | ×     | No reaction                   |
| 11     | 400      | 200       | 8                                                              | 12               | ✓              | ×     | No reaction                   |
| 12     | 400      | 200       | 8                                                              | 0                | ✓              | ✓     | Gel formed dissolves in water |

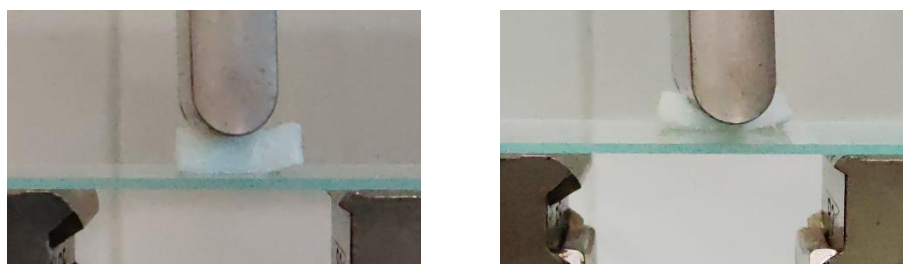

**Figure S7.** Photographic image showing compression of the hydrogel (a) uncompressed, and (b) compressed

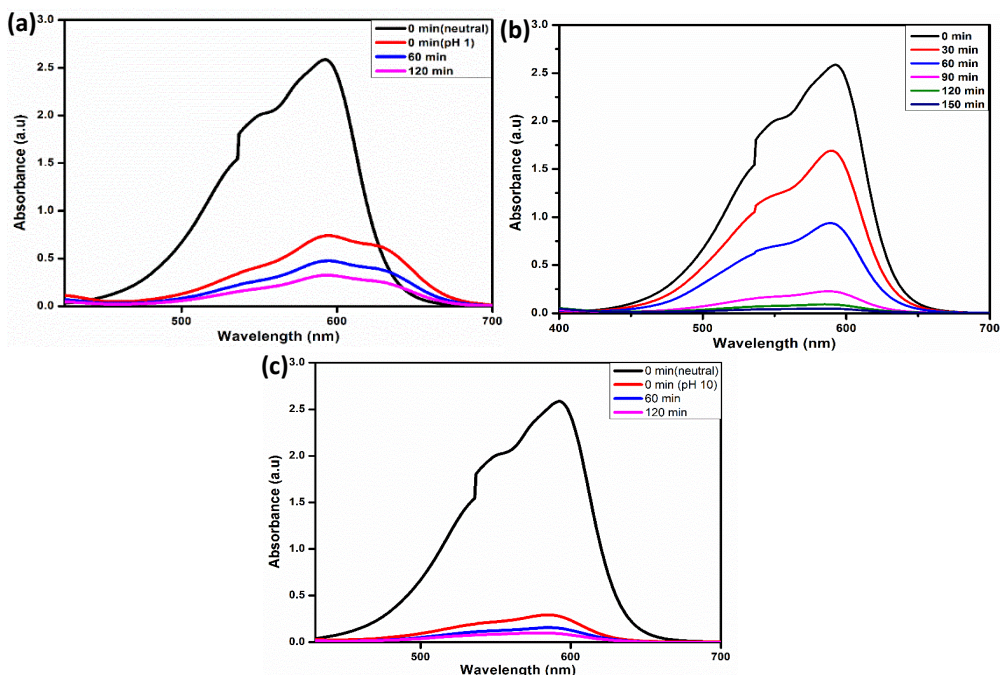

**Figure S8.** UV-Visible absorbance spectra of the dye molecule treated at different solution of (a) pH 1, (b) neutral (pH 7) and (c) pH 10 under light irradiation at definite time interval

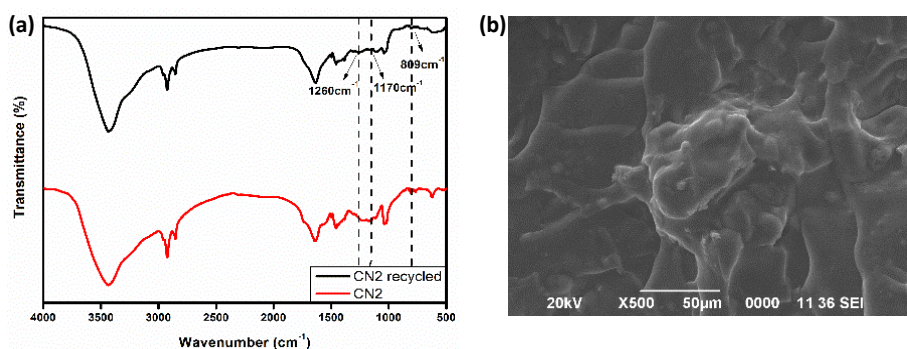

**Figure S9.** FTIR spectra of the hydrogel before and after recycling and (b) SEM morphology of the hydrogel after recycling

FTIR spectra of the CN hydrogel after the 5<sup>th</sup> cycle showed no appreciable change. However, there is a small decrease in intensity in the range of  $1250\text{cm}^{-1}$  to  $1150\text{cm}^{-1}$ . The decrease in intensity around  $1250\text{cm}^{-1}$  is due to the electrostatic interaction of the C-N group of the hydrogel with residual CV dye molecules. Similarly, the decrease in intensity around  $1170\text{cm}^{-1}$  is due to the interaction of the  $-\text{SO}_3$  group of hydrogels with the CV dye molecules. The small peak at  $809\text{cm}^{-1}$  depicts the presence of  $\text{g-C}_3\text{N}_4$  in the dye-treated hydrogel. The SEM morphology of the hydrogel after the 5<sup>th</sup> cycle demonstrates a nonporous and smooth wavy surface which is due to the subsequent drying and swelling process that causes a change in morphology on the hydrogel surface. Therefore, the above results indicate that, although the hydrogel shows recyclability up to 5 cycles, a small portion of residual dye molecules got adsorbed within the hydrogel matrix thereby causing small changes in the structure and morphology of the dye-treated hydrogel.

**Table S2.** Isotherm parameters for adsorption of CV dye by CN hydrogel

| Models     | Parameters                 |       |
|------------|----------------------------|-------|
| Langmuir   | $q_{\max}$ (mg/g)          | 100   |
|            | $K_L$ (Lmg <sup>-1</sup> ) | 2.5   |
|            | $R^2$                      | 0.996 |
| Freundlich | 1/n                        | 0.626 |
|            | $K_F$                      | 75.18 |
|            | $R^2$                      | 0.96  |

**Table S3.** Kinetic parameters for adsorption of CV dyes by CN hydrogel with different adsorbent dosage

| Adsorbent dosage (mg) | $q_e$ (exp.) (mg/g) | Kinetic model      |                    |       |                     |                    |       |
|-----------------------|---------------------|--------------------|--------------------|-------|---------------------|--------------------|-------|
|                       |                     | Pseudo-first order |                    |       | Pseudo-second order |                    |       |
|                       |                     | $k_1$ (g/mg.h)     | $q_e$ (cal) (mg/g) | $R^2$ | $k_2$ (g/mg.h)      | $q_e$ (cal) (mg/g) | $R^2$ |
| 25                    | 12.18               | 0.25               | 10.89              | 0.960 | 0.03                | 13.94              | 0.995 |
| 50                    | 6.09                | 0.18               | 4.18               | 0.968 | 0.059               | 6.61               | 0.998 |
| 75                    | 4.03                | 0.267              | 4.61               | 0.985 | 0.052               | 4.76               | 0.970 |
| 100                   | 3.04                | 0.265              | 2.57               | 0.955 | 0.144               | 3.28               | 0.994 |

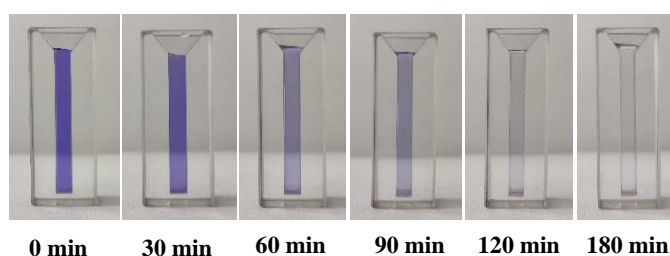**Figure S10.** Photographic image showing dye removal by the hydrogel under light irradiation at definite time interval
